# Supplementary material
Source: MDPI journal article supplement (https://www.mdpi.com/2076-3417/11/21/10056)
Supplement: s1 [file s1]

# Studying the Effect of Chondroitin Sulfate on the Physico-chemical Properties of Novel Gelatin/Chitosan Biopolymer-Based Cryogels

Gulshakhar Kudaibergen<sup>1\*</sup>, Madina Zhunussova<sup>1</sup>, Ellina A. Mun<sup>2</sup>, Anar Arinova<sup>3</sup> and Vyacheslav Ogay<sup>1</sup>

<sup>1</sup> Stem Cell Laboratory, National Center for Biotechnology, Nur-Sultan 010000, Kazakhstan; zhunussova@biocenter.kz (M.Zh.); ogay@biocenter.kz (V.O.)

<sup>2</sup> School of Science and Humanities, Nazarbayev University, Nur-Sultan 010000, Kazakhstan; ellina.mun@nu.edu.kz (E.A.M.)

<sup>3</sup> National Laboratory Astana, Nazarbayev University, Nur-Sultan 010000, Kazakhstan; arinova.777@mail.ru (A.A.)

\* Correspondence: kudaibergen@biocenter.kz

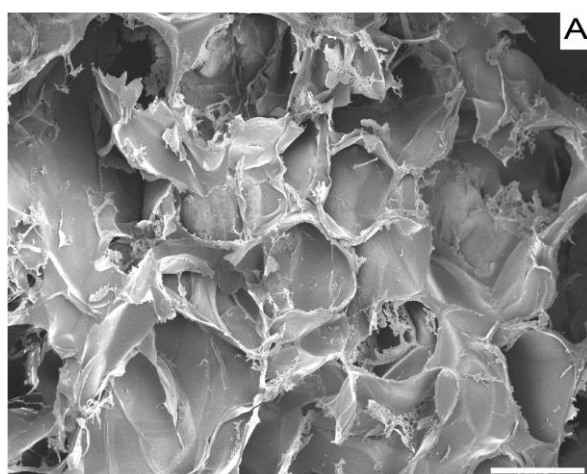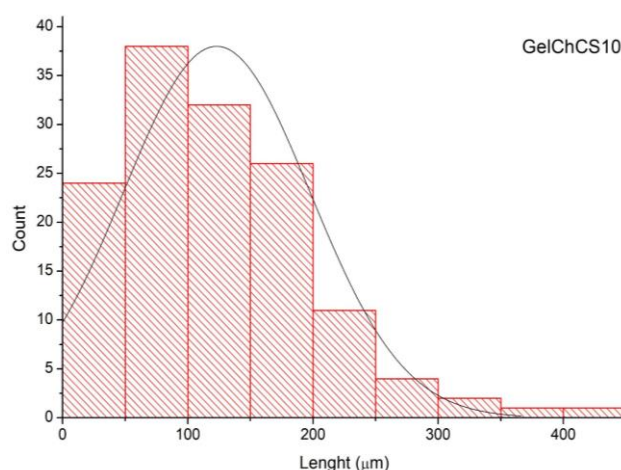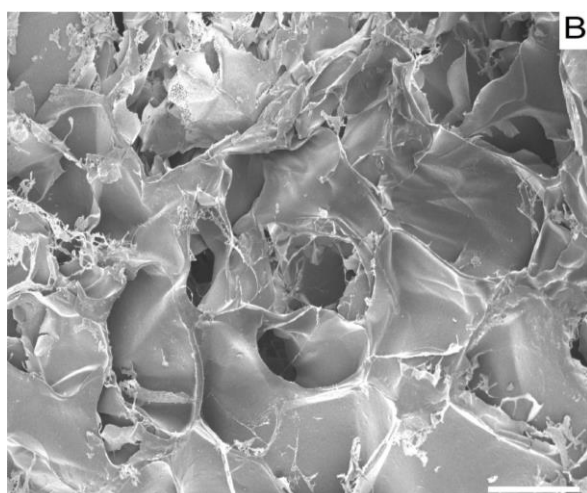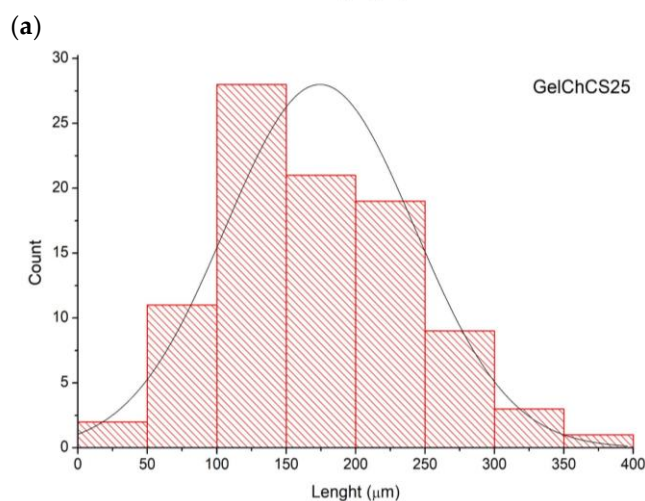

**(b)**

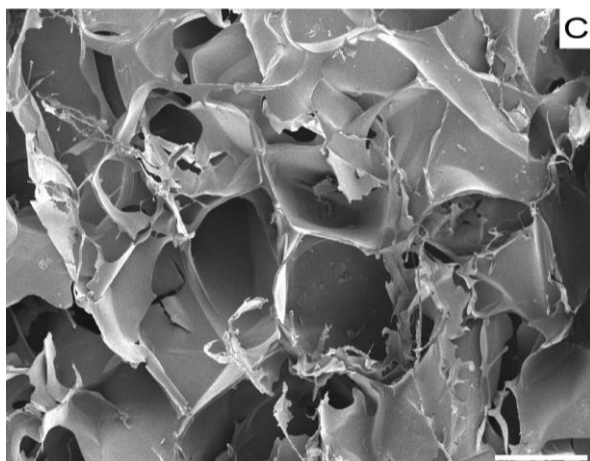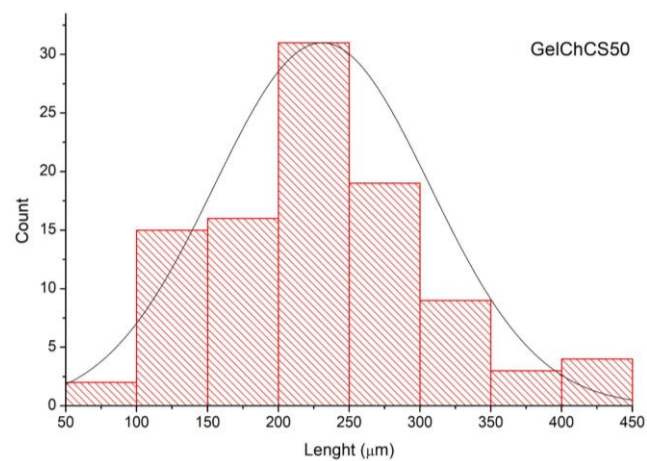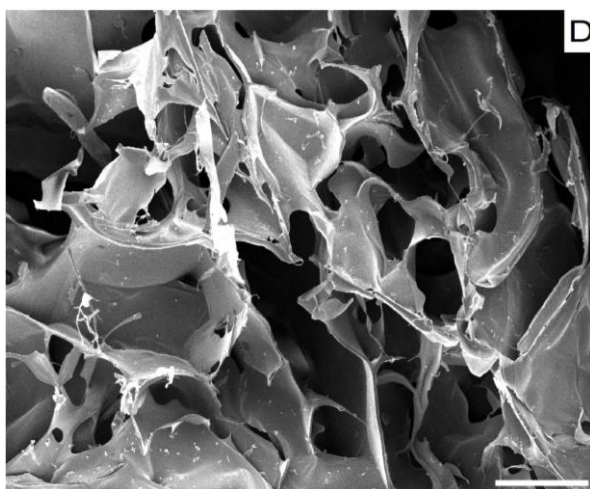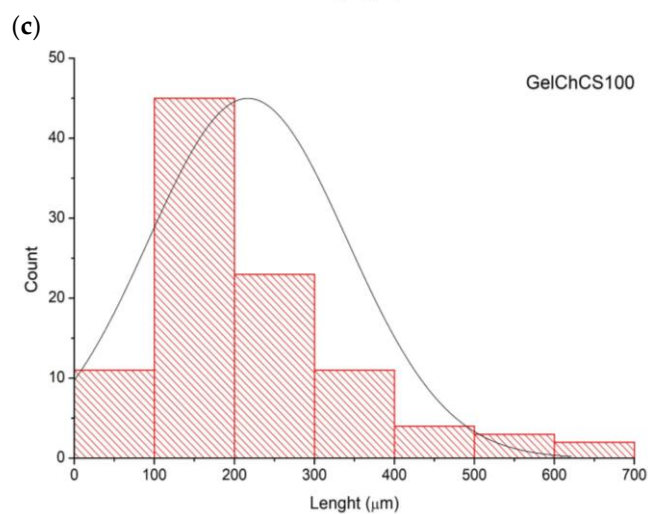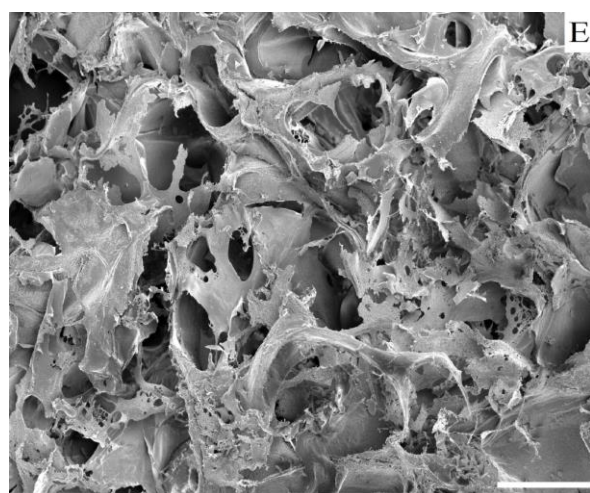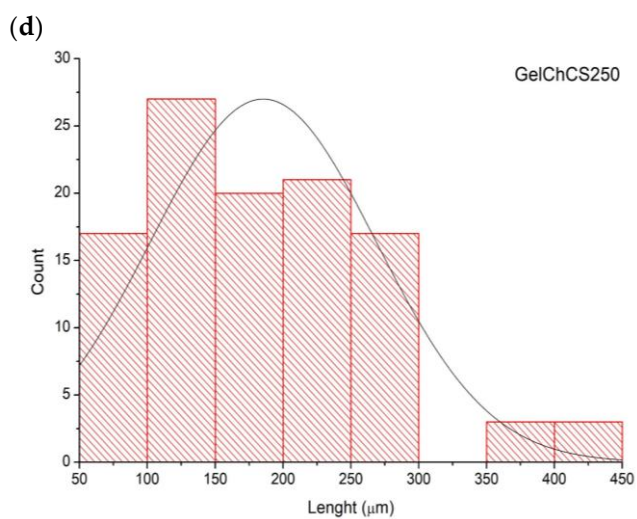

(e)

**Figure S1.** SEM images and histogram of pore sizes of the cryogels: (A) GelChCS10; (B) GelChCS25; (C) GelChCS50; (D) GelChCS100; (E) GelChCS250. Scale bar = 100μm.
